# Supplementary material for: Towards universal buckling dynamics in nanocolloidal sessile droplets: the effect of hydrophilic to superhydrophobic substrates and evaporation modes
Source: Royal Society of Chemistry journal article supplement (doi:10.1039/c6sm00837b), 2016-01-01
Supplement: c6sm00837b1.pdf [file c6sm00837b1.pdf]

**Towards Universal Buckling Dynamics in Nanocolloidal Sessile Droplets: Effect of Hydrophilic to Superhydrophobic Substrates and Evaporation Modes**

**Electronic Supplementary Information**

Supplementary movies:

Movie V1 shows the evaporation of 20 vol.% TM suspension on a GDL substrate. It shows a sequential process of dome formation, buckling and subsequent cavity growth inside the droplet (as annotated in the video). In this case a hollow precipitate is obtained.

Movie V2 shows the evaporation of 3 vol.% TM suspension on a GDL substrate. In this video, no dome formation and hence no buckling is observed. Therefore, the residual final structure obtained is a flat disc.

Movie V3 shows the evaporation of 20 vol.% TM suspension on a hydrophilic substrate. There is no buckling even at very high concentration.
